# Supplementary material for: New Ethical Issues for Genetic Counseling in Common Mental Disorders
Source: Atypon-hosted journal article supplement (doi:10.1176/appi.ajp.2013.12121558), 2013-07-30
Supplement: 968_ds001.pdf [file 968_ds001.pdf]

## Supplementary Information

### Attributable Risk and Exposed Attributable Risk: Relation to heritability

One frequently used concept in risk prediction is Population Attributable Risk (PAR). This is the proportion of the population risk for a disorder that can be attributed to a risk factor. It is not the same as the probability that a person will develop the disorder. If the total population risk of a disorder is 1%, and a polymorphic marker has a PAR of 10%, then 10% of the 1% population risk is attributable to that genetic variation. If all population risk factors were known, the sum of PARs would be 100%. Using standard measures of attributable risk (1, 2), applied to a recently published mega-analysis of 11,977 patients and 51,672 controls (Table 1), the two GWAS SNP markers significantly associated with BD ( $p < 5 \times 10^{-8}$ ) would account for 4.82% of the 1% population risk of illness (3). Between them, these alleles account for 11.87% of the BD PAR (computations per Abrahamson (1)). For SZ, the attributable risks are somewhat higher; all the PARs in the most recent published mega-analysis account for 31.18% of risk of all exposed persons. Once the recent meeting presentation on SZ is published, the PAR may increase only modestly, because the new associated markers have weak effects.

PAR is a function of allele frequency, as is heritability at a given locus, and a rare allele will generally not contribute significantly to either statistic, even though a rare allele can contribute very heavily to the probability that an individual who has the allele will develop disease. In a 2001 article, Risch (4) demonstrated that PAR estimates and heritability estimates can diverge widely on analysis of the same phenotypic data in relatives, in part because of the additive and multifactorial assumptions underlying heritability calculations. He also anticipated the problems that later arose of connecting risk at specific loci to heritability statistics for a disease.

Although we refer to heritability in this paper, the focus is on risk estimates and risk attribution, which are the major questions addressed in counseling. For risk counseling, the Exposed Attributable Risk (EAR) is a very useful statistic: EAR is the proportion of a person's risk of illness that is due to his or her being exposed to a risk factor (in our discussion, having particular genetic marker(s)). It is calculated as

$$\text{EAR} = \frac{(P(D) - P(D|\bar{E}))}{P(D)}$$

Where  $P(D)$  is the probability of disease in the population, and  $P(D|\bar{E})$  is the probability of having the disease for those individuals not exposed to the risk factor.

Bayesian probability of risk of illness given genotype is defined as:

$$P(D|M) = \frac{(P(D) \times P(M|D))}{(P(D) \times P(M|D)) + (1 - P(D)) \times P(M|\bar{D})}$$

where  $P(D)$  is the probability of the disease in the population (estimated as the observed frequency in the population, 1% for BP and SZ, and 0.6% for Autism).  $P(M|D)$  is the probability of an associated SNP or other marker in an individual who has disease (estimated as frequency in cases), and  $P(M|\bar{D})$  is the probability of a positive test in an individual not having disease (estimated as frequency of marker in controls). Several major GWAS mega-analyses have been published recently on Bipolar Disorder (5) as well as for Schizophrenia (6, 7), with often overlapping data sources. In this paper, we selected the published papers with the largest aggregated sample size for each disease. The clinician reader of this paper will be repeatedly faced with new reports of genetic associations from mega-analyses of GWAS SNP data, and there are web sites where the reader can do the calculation of this Bayesian probability on new reported associations by entering the frequencies of SNP markers in patients and controls (such as <http://psych.fullerton.edu/mbirnbaum/bayes/BayesCalc.htm>).

**TABLE S1. Attributable Risks for Rare CNVs associated with ASD, SZ or BD**

| CNV Locus    | Type        | ASD   |      | SZ    |      | BD    |      |
|--------------|-------------|-------|------|-------|------|-------|------|
|              |             | EAR   | PAR  | EAR   | PAR  | EAR   | PAR  |
| 1q21.1       | deletion    |       |      | 87.7% | 0.2% |       |      |
|              | duplication | 87.5% | 0.2% | 76.3% | 0.1% |       |      |
| 3q29         | deletion    |       |      | 98.4% | 0.1% |       |      |
| 7q11.23      | duplication | 96.7% | 0.2% |       |      |       |      |
| 15q11.2      | deletion    |       |      | 53.2% | 0.3% |       |      |
| 15q11.2-13.1 | duplication | 97.6% | 0.5% |       |      |       |      |
| 15q13.3      | deletion    | 90.7% | 0.2% | 90.7% | 0.2% |       |      |
| 16p11.2      | deletion    | 89.4% | 0.4% |       |      |       |      |
|              | duplication | 91.5% | 0.4% | 89.3% | 0.3% | 74.4% | 0.1% |
| 17p12        | deletion    |       |      | 82.6% | 0.1% |       |      |
| 22q11.21     | deletion    | 97.9% | 0.1% | 99.5% | 0.8% | 97.4% | 0.1% |
| 22q11.2      | duplication | 69.5% | 0.2% |       |      |       |      |

EAR: Exposed Attributable Risk in individuals with each rare CNV. PAR: Population Attributable Risk.

EAR and PAR calculations by WINPEPI (1). Data source: Malhotra & Sebat 2012 (8).

### References

1. Abramson JH: WINPEPI updated: computer programs for epidemiologists, and their teaching potential. *Epidemiol Perspect Innov* 2011; 8(1):1
2. Benichou J: Biostatistics and epidemiology: measuring the risk attributable to an environmental or genetic factor. *C R Biol* 2007; 330(4):281-298
3. Psychiatric GWAS Consortium Bipolar Disorder Working Group, Sklar P, Ripke S, Scott LJ, Andreassen OA, Cichon S, Craddock N, Edenberg HJ, Nurnberger JI, Jr., Rietschel M, Blackwood D, Corvin A, Flickinger M, Guan W, Mattingsdal M, McQuillin A, Kwan P,

- Wienker TF, Daly M, Dudbridge F, Holmans PA, Lin D, Burmeister M, Greenwood TA, Hamshere ML, Muglia P, Smith EN, Zandi PP, Nievergelt CM, McKinney R, Shilling PD, Schork NJ, Bloss CS, Foroud T, Koller DL, Gershon ES, Liu C, Badner JA, Scheftner WA, Lawson WB, Nwulia EA, Hipolito M, Coryell W, Rice J, Byerley W, McMahon FJ, Schulze TG, Berrettini W, Lohoff FW, Potash JB, Mahon PB, McInnis MG, Zollner S, Zhang P, Craig DW, Szelinger S, Barrett TB, Breuer R, Meier S, Strohmaier J, Witt SH, Tozzi F, Farmer A, McGuffin P, Strauss J, Xu W, Kennedy JL, Vincent JB, Matthews K, Day R, Ferreira MA, O'Dushlaine C, Perlis R, Raychaudhuri S, Ruderfer D, Hyoun PL, Smoller JW, Li J, Absher D, Thompson RC, Meng FG, Schatzberg AF, Bunney WE, Barchas JD, Jones EG, Watson SJ, Myers RM, Akil H, Boehnke M, Chambert K, Moran J, Scolnick E, Djurovic S, Melle I, Morken G, Gill M, Morris D, Quinn E, Muhleisen TW, Degenhardt FA, Mattheisen M, Schumacher J, Maier W, Steffens M, Propping P, Nothen MM, Anjorin A, Bass N, Gurling H, Kandaswamy R, Lawrence J, McGhee K, McIntosh A, McLean AW, Muir WJ, Pickard BS, Breen G, St CD, Caesar S, Gordon-Smith K, Jones L, Fraser C, Green EK, Grozeva D, Jones IR, Kirov G, Moskvina V, Nikolov I, O'Donovan MC, Owen MJ, Collier DA, Elkin A, Williamson R, Young AH, Ferrier IN, Stefansson K, Stefansson H, Thornorgeirsson T, Steinberg S, Gustafsson O, Bergen SE, Nimgaonkar V, Hultman C, Landen M, Lichtenstein P, Sullivan P, Schalling M, Osby U, Backlund L, Frisen L, Langstrom N, Jamain S, Leboyer M, Etain B, Bellivier F, Petursson H, Sigur SE, Muller-Mysok B, Lucae S, Schwarz M, Schofield PR, Martin N, Montgomery GW, Lathrop M, Oskarsson H, Bauer M, Wright A, Mitchell PB, Hautzinger M, Reif A, Kelsoe JR, Purcell SM: Large-scale genome-wide association analysis of bipolar disorder identifies a new susceptibility locus near ODZ4. *Nat Genet* 2011;
4. Risch N: The genetic epidemiology of cancer: interpreting family and twin studies and their implications for molecular genetic approaches. *Cancer Epidemiol Biomarkers Prev* 2001; 10(7):733-741
  5. Cichon S, Muhleisen TW, Degenhardt FA, Mattheisen M, Miro X, Strohmaier J, Steffens M, Meesters C, Herms S, Weingarten M, Priebe L, Haenisch B, Alexander M, Vollmer J, Breuer R, Schmal C, Tessmann P, Moebus S, Wichmann HE, Schreiber S, Muller-Myhsok B, Lucae S, Jamain S, Leboyer M, Bellivier F, Etain B, Henry C, Kahn JP, Heath S, Bipolar Disorder Genome Study (BiGS) Consortium, Hamshere M, O'Donovan MC, Owen MJ, Craddock N, Schwarz M, Vedder H, Kammerer-Ciernioch J, Reif A, Sasse J, Bauer M, Hautzinger M, Wright A, Mitchell PB, Schofield PR, Montgomery GW, Medland SE, Gordon SD, Martin NG, Gustafsson O, Andreassen O, Djurovic S, Sigurdsson E, Steinberg S, Stefansson H, Stefansson K, Kapur-Pojkic L, Oruc L, Rivas F, Mayoral F, Chuchalin A, Babadjanova G, Tiganov AS, Pantelejeva G, Abramova LI, Grigoriu-Serbanescu M, Diaconu CC, Czerski PM, Hauser J, Zimmer A, Lathrop M, Schulze TG, Wienker TF, Schumacher J, Maier W, Propping P, Rietschel M, Nothen MM: Genome-wide association study identifies genetic variation in neurocan as a susceptibility factor for bipolar disorder. *Am J Hum Genet* 2011; 88(3):372-381
  6. Steinberg S, de JS, Irish Schizophrenia Genomics Consortium, Andreassen OA, Werge T, Borglum AD, Mors O, Mortensen PB, Gustafsson O, Costas J, Pietilainen OP, Demontis D, Papiol S, Huttenlocher J, Mattheisen M, Breuer R, Vassos E, Giegling I, Fraser G, Walker N, Tuulio-Henriksson A, Suvisaari J, Lonnqvist J, Paunio T, Agartz I, Melle I, Djurovic S, Strengman E, GROUP, Jurgens G, Glenthøj B, Terenius L, Hougaard DM, Orntoft T, Wiuf C, Didriksen M, Hollegaard MV, Nordentoft M, van WR, Kenis G, Abramova L, Kaleda V,

- Arrojo M, Sanjuan J, Arango C, Sperling S, Rossner M, Ribolsi M, Magni V, Siracusano A, Christiansen C, Kiemenev LA, Veldink J, van den BL, Ingason A, Muglia P, Murray R, Nothen MM, Sigurdsson E, Petursson H, Thorsteinsdottir U, Kong A, Rubino IA, De HM, Rethelyi JM, Bitter I, Jonsson EG, Golimbet V, Carracedo A, Ehrenreich H, Craddock N, Owen MJ, O'Donovan MC, Wellcome Trust Case Control Consortium, Ruggeri M, Tosato S, Peltonen L, Ophoff RA, Collier DA, St CD, Rietschel M, Cichon S, Stefansson H, Rujescu D, Stefansson K: Common variants at VRK2 and TCF4 conferring risk of schizophrenia. *Hum Mol Genet* 2011; 20(20):4076-4081
7. Schizophrenia Psychiatric Genome-Wide Association Study (GWAS) Consortium: Genome-wide association study identifies five new schizophrenia loci. *Nat Genet* 2011; 43(10):969-976
  8. Malhotra D, Sebat J: CNVs: harbingers of a rare variant revolution in psychiatric genetics. *Cell* 2012; 148(6):1223-1241
